# Supplementary material for: Molecular Results and Potential Biomarkers Identified from the Phase 3 MILO/ENGOT-ov11 Study of Binimetinib versus Physician Choice of Chemotherapy in Recurrent Low-Grade Serous Ovarian Cancer
Source: PubMed Central journal article supplement — Clin Cancer Res. 2023 Aug 15;29(20):4068–75. doi: 10.1158/1078-0432.CCR-23-0621 (PMC10570675; doi:10.1158/1078-0432.ccr-23-0621), 2023-08-15

**Supplemental Table 1. List of gene panel analyzed by FoundationOne™ next-generation sequencing-based assay**

|        |                 |        |        |               |              |         |         |        |
|--------|-----------------|--------|--------|---------------|--------------|---------|---------|--------|
| ABL1   | C11orf30 (EMSY) | DDR2   | FGFR4  | IL7R          | MET          | PIK3CA  | SDHD    | TSHR   |
| ABL2   | CARD11          | DICER1 | FH     | INHBA         | MITF         | PIK3CB  | SETD2   | U2AF1  |
| ACVR1B | CBFB            | DNMT3A | FLCN   | INPP4B        | MLH1         | PIK3CG  | SF3B1   | VEGFA  |
| AKT1   | CBL             | DOT1L  | FLT1   | IRF2          | MPL          | PIK3R1  | SLIT2   | VHL    |
| AKT2   | CCND1           | EGFR   | FLT1   | IRF4          | MRE11A       | PIK3R2  | SMAD2   | WISP3  |
| AKT3   | CCND2           | EP300  | FLT4   | IRS2          | MSH2         | PLCG2   | SMAD3   | WT1    |
| ALK    | CCND3           | EPHA3  | FOXL2  | JAK1          | MSH6         | PMS2    | SMAD4   | XPO1   |
| AMER1  | CCNE1           | EPHA5  | FOXP1  | JAK2          | MTOR         | POLD1   | SMARCA4 | ZBTB2  |
| APC    | CD274           | EPHA7  | FRS2   | JAK3          | MUTYH        | POLE    | SMARCB1 | ZNF217 |
| AR     | CD79A           | EPHB1  | FUBP1  | JUN           | MYC          | PPP2R1A | SMO     | ZNF703 |
| ARAF   | CD79B           | ERBB2  | GABRA6 | KAT6A (MYST3) | MYCL (MYCL1) | PRDM1   | SNCAIP  |        |
| ARFRP1 | CDC73           | ERBB3  | GATA1  | KDM5A         | MYCN         | PREX2   | SOCS1   |        |
| ARID1A | CDH1            | ERBB4  | GATA2  | KDM5C         | MYD88        | PRKAR1A | SOX10   |        |
| ARID1B | CDK12           | ERG    | GATA3  | KDM6A         | NF1          | PRKCI   | SOX2    |        |
| ARID2  | CDK4            | ERRFI1 | GATA4  | KDR           | NF2          | PRKDC   | SOX9    |        |
| ASXL1  | CDK6            | ESR1   | GATA6  | KEAP1         | NFE2L2       | PRSS8   | SPEN    |        |
| ATM    | CDK8            | EZH2   | GID4   | KEL           | NFKBIA       | PTCH1   | SPOP    |        |
| ATR    | CDKN1A          | FAM46C | GLI1   | KIT           | NKX2-1       | PTEN    | SPTA1   |        |
| ATRX   | CDKN1B          | FANCA  | GNA11  | KLHL6         | NOTCH1       | PTPN11  | SRC     |        |
| AURKA  | CDKN2A          | FANCC  | GNA13  | KMT2A (MLL)   | NOTCH2       | QKI     | STAG2   |        |
| AURKB  | CDKN2B          | FANCD2 | GNAQ   | KMT2C (MLL3)  | NOTCH3       | RAC1    | STAT3   |        |
| AXIN1  | CDKN2C          | FANCE  | GNAS   | KMT2D (MLL2)  | NPM1         | RAD50   | STAT4   |        |
| AXL    | CEBPA           | FANCF  | GPR124 | KRAS          | NRAS         | RAD51   | STK11   |        |

|        |        |       |          |        |          |         |                |  |
|--------|--------|-------|----------|--------|----------|---------|----------------|--|
| BAP1   | CHD2   | FANCG | GRIN2A   | LMO1   | NSD1     | RAF1    | SUFU           |  |
| BARD1  | CHD4   | FANCL | GRM3     | LRP1B  | NTRK1    | RANBP2  | SYK            |  |
| BCL2   | CHEK1  | FAS   | GSK3B    | LYN    | NTRK2    | RARA    | TAF1           |  |
| BCL2L1 | CHEK2  | FAT1  | H3F3A    | LZTR1  | NTRK3    | RB1     | TBX3           |  |
| BCL2L2 | CIC    | FBXW7 | HGF      | MAGI2  | NUP93    | RBM10   | TERC           |  |
| BCOR   | CREBBP | FGF10 | HNF1A    | MAP2K1 | PAK3     | RET     | TERT(promoter) |  |
| BCORL1 | CRKL   | FGF14 | HRAS     | MAP2K2 | PALB2    | RICTOR  | TET2           |  |
| BLM    | CRLF2  | FGF19 | HSD3B1   | MAP2K4 | PARK2    | RNF43   | TGFBR2         |  |
| BRAF   | CSF1R  | FGF23 | HSP90AA1 | MAP3K1 | PAX5     | ROS1    | TNFAIP3        |  |
| BRCA1  | CTCF   | FGF3  | IDH1     | MCL1   | PBRM1    | RPTOR   | TNFRSF14       |  |
| BRCA2  | CTNNA1 | FGF4  | IDH2     | MDM2   | PDCD1LG2 | RUNX1   | TOP1           |  |
| BRD4   | CTNNB1 | FGF6  | IGF1R    | MDM4   | PDGFRA   | RUNX1T1 | TOP2A          |  |
| BRIP1  | CUL3   | FGFR1 | IGF2     | MED12  | PDGFRB   | SDHA    | TP53           |  |
| BTG1   | CYLD   | FGFR2 | IKBKE    | MEF2B  | PDK1     | SDHB    | TSC1           |  |
| BTK    | DAXX   | FGFR3 | IKZF1    | MEN1   | PIK3C2B  | SDHC    | TSC2           |  |

**Supplemental Table 2: Distribution of MAPK pathway alterations identified in all patients and by treatment arm**

| <b>Distribution of MAPK Pathway Alterations</b> | <b>Overall<br/>(n=215)</b> | <b>Binimetinib<br/>(n=144)</b> | <b>PCC<br/>(n=71)</b> |
|-------------------------------------------------|----------------------------|--------------------------------|-----------------------|
| BRAF V600E                                      | 9 (4.2%)                   | 8 (5.6%)                       | 1 (1.4%)              |
| KRAS G12A                                       | 2 (0.9%)                   | 1 (0.7%)                       | 1 (1.4%)              |
| KRAS G12C                                       | 5 (2.3%)                   | 4 (2.8%)                       | 1 (1.4%)              |
| KRAS G12D                                       | 20 (9.3%)                  | 14 (9.7%)                      | 6 (8.5%)              |
| KRAS G12V                                       | 35 (16%)                   | 20 (13.9%)                     | 15 (21%)              |
| KRAS G13D                                       | 2 (0.9%)                   | 2 (1.4%)                       | 0 (0%)                |
| KRAS Q61H                                       | 2 (0.9%)                   | 1 (0.7%)                       | 1 (1.4%)              |
| KRAS Q61K                                       | 3 (1.4%)                   | 3 (2.1%)                       | 0 (0%)                |
| KRAS Q61L                                       | 1 (0.5%)                   | 1 (0.7%)                       | 0 (0%)                |
| NRAS amplification                              | 1 (0.5%)                   | 1 (0.7%)                       | 0 (0%)                |
| NRAS G12V                                       | 1 (0.5%)                   | 0 (0%)                         | 1 (1.4%)              |
| NRAS Q61K                                       | 2 (0.9%)                   | 2 (1.4%)                       | 0 (0%)                |
| NRAS Q61R                                       | 17 (7.9%)                  | 9 (6.3%)                       | 8 (11%)               |
| NF1 D1122fs*20                                  | 1 (0.5%)                   | 1 (0.7%)                       | 0 (0%)                |
| NF1 duplication                                 | 1 (0.5%)                   | 0 (0%)                         | 1 (1.4%)              |
| NF1 E2368*                                      | 1 (0.5%)                   | 1 (0.7%)                       | 0 (0%)                |
| NF1 I679fs*21                                   | 1 (0.5%)                   | 1 (0.7%)                       | 0 (0%)                |
| NF1 L2604V                                      | 1 (0.5%)                   | 0 (0%)                         | 1 (1.4%)              |
| NF1 loss                                        | 1 (0.5%)                   | 0 (0%)                         | 1 (1.4%)              |
| NF1 P2509S                                      | 1 (0.5%)                   | 1 (0.7%)                       | 0 (0%)                |
| NF1 P563T                                       | 1 (0.5%)                   | 0 (0%)                         | 1 (1.4%)              |
| NF1 R440*                                       | 1 (0.5%)                   | 1 (0.7%)                       | 0 (0%)                |
| NF1 R873C                                       | 1 (0.5%)                   | 1 (0.7%)                       | 0 (0%)                |
| NF1 S2186*                                      | 1 (0.5%)                   | 1 (0.7%)                       | 0 (0%)                |
| NF1 splice site 1687_1721+8del43                | 1 (0.5%)                   | 0 (0%)                         | 1 (1.4%)              |
| NF1 splice site 6819+1G>A                       | 1 (0.5%)                   | 1 (0.7%)                       | 0 (0%)                |
| NF1 T676P                                       | 1 (0.5%)                   | 1 (0.7%)                       | 0 (0%)                |
| RAF1 loss                                       | 1 (0.5%)                   | 1 (0.7%)                       | 0 (0%)                |
| RAF1 R191I                                      | 1 (0.5%)                   | 0 (0%)                         | 1 (1.4%)              |
| RAF1 Y340C                                      | 1 (0.5%)                   | 1 (0.7%)                       | 0 (0%)                |

PCC, physician's choice of chemotherapy

**Supplemental Table 3a and 3b: Multivariate genomic models for PFS and best overall response outcomes.**

**Supplemental Table 3a: Multivariable Cox regression on PFS**

| <b>Characteristic</b> | <b>HR<sup>1</sup></b> | <b>95% CI<sup>1</sup></b> | <b>P</b>     |
|-----------------------|-----------------------|---------------------------|--------------|
| <b>KRAS</b>           | 0.53                  | 0.32, 0.89                | <b>0.016</b> |
| <b>ARID1B</b>         | 0.48                  | 0.24, 0.95                | <b>0.034</b> |

<sup>1</sup>HR, hazard ratio; CI, confidence interval

**Supplemental Table 3b: Multivariable logistic regression for Overall Response**

| <b>Characteristic</b> | <b>OR<sup>1</sup></b> | <b>95% CI<sup>1</sup></b> | <b>P</b>         |
|-----------------------|-----------------------|---------------------------|------------------|
| <b>KRAS</b>           | 4.47                  | 1.94, 10.7                | <b>&lt;0.001</b> |
| <b>NRAS</b>           | 4.65                  | 1.18, 18.0                | <b>0.024</b>     |

<sup>1</sup>OR, odds ratio; CI, confidence interval

**Supplemental Table 4: Comparison of best response for patients treated with binimetinib and with *KRAS* G12V vs other *KRAS* variants.**

|                                    | <b><i>KRAS</i> G12V Mutation (n=19)</b> | <b>Other <i>KRAS</i> Mutation (n=26)</b> | <b><i>P</i> value</b> |
|------------------------------------|-----------------------------------------|------------------------------------------|-----------------------|
| <b>Best Response by RECIST 1.1</b> | n (%)                                   | n (%)                                    | 0.3                   |
| Complete Response                  | 1 (5.3%)                                | 3 (12%)                                  |                       |
| Partial Response                   | 9 (47%)                                 | 7 (27%)                                  |                       |
| Stable Disease                     | 8 (42%)                                 | 16 (62%)                                 |                       |
| Progressive Disease                | 1 (5.3%)                                | 0 (0%)                                   |                       |

RECIST, Response Evaluation Criteria in Solid Tumors

*P* value calculated with the Fisher exact test.

**Supplemental Figure 1a and 1b: Volcano plots PFS (1a) and best overall response (1b).** Lower dotted line is  $P < 0.05$  threshold and higher dotted line is  $FDR < 0.05$  threshold for multiple testing adjustment. (responder= best response of complete response or partial response; non-responder = best response of stable disease or progressive disease)

**Supplemental Figure 1a:**

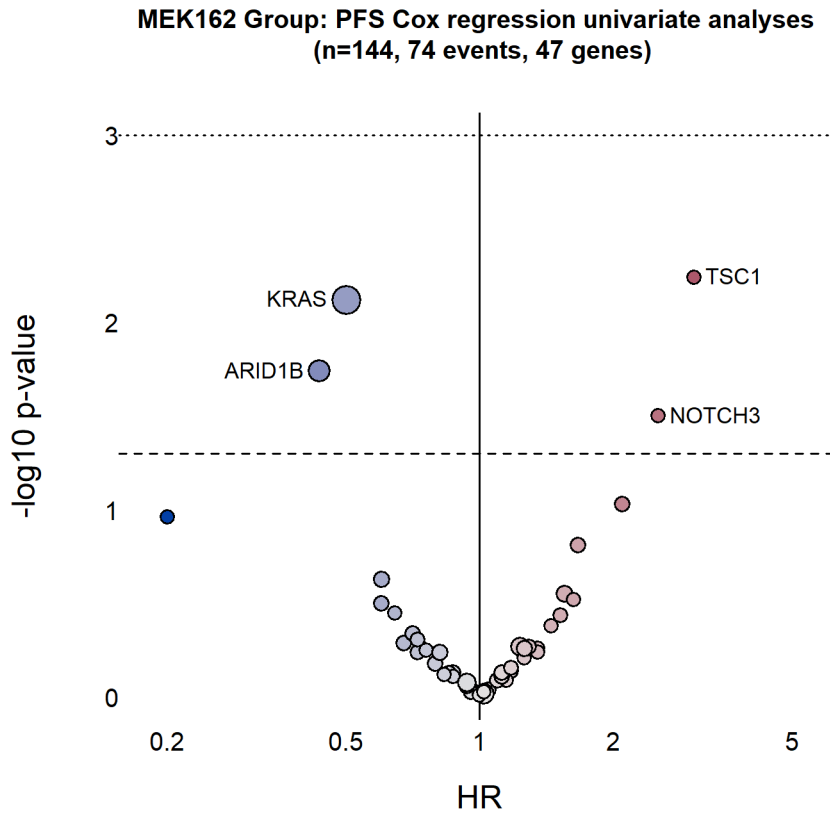

Supplemental Figure 1b:

MEK162 Group: Univariate analyses for binary response  
(n=98 nonresponders, 37 responders, 51 genes)

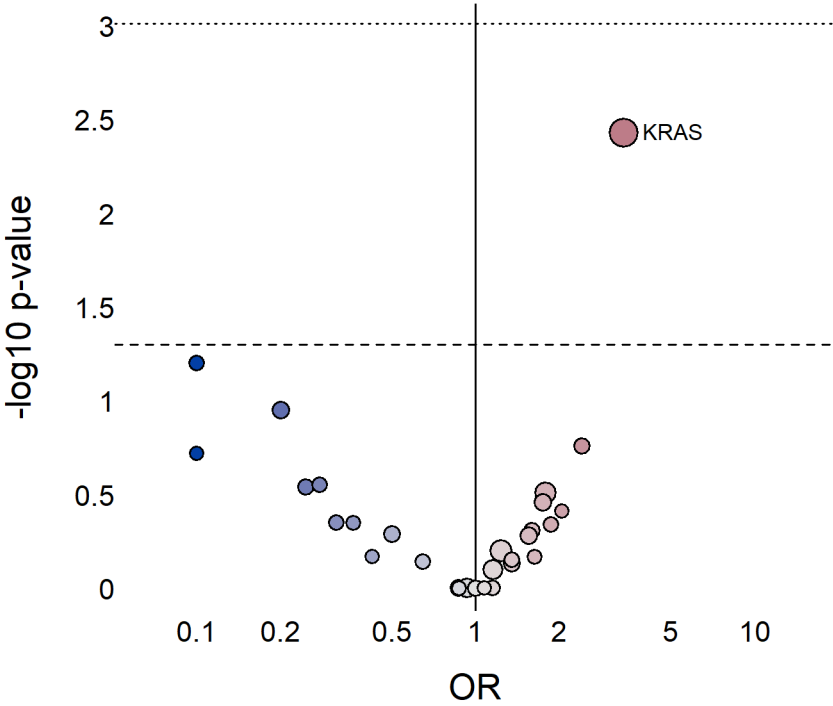

Supplement: ccr-23-0621_supplementary_data_1_suppds1.pdf [file ccr-23-0621_supplementary_data_1_suppds1.pdf]
